# Supplementary material for: Complexes of a hexa-nitrile dianion with neutral, chelating co-ligands: Self-assembly, structure and magnetism
Source: Royal Society of Chemistry journal article supplement (doi:10.1039/c1dt11369k), 2011-01-01
Supplement: c1dt11369k.pdf [file c1dt11369k.pdf]

# Complexes of a Hexa-Nitrile Dianion with Neutral, Chelating Co-Ligands: Self-assembly, Structure and Magnetism

Anna M. Kutasi, David R. Turner, Boujemaa Moubaraki, Stuart R. Batten\* and Keith S. Murray\*

## Supporting Information

### Magnetic Moment Plots

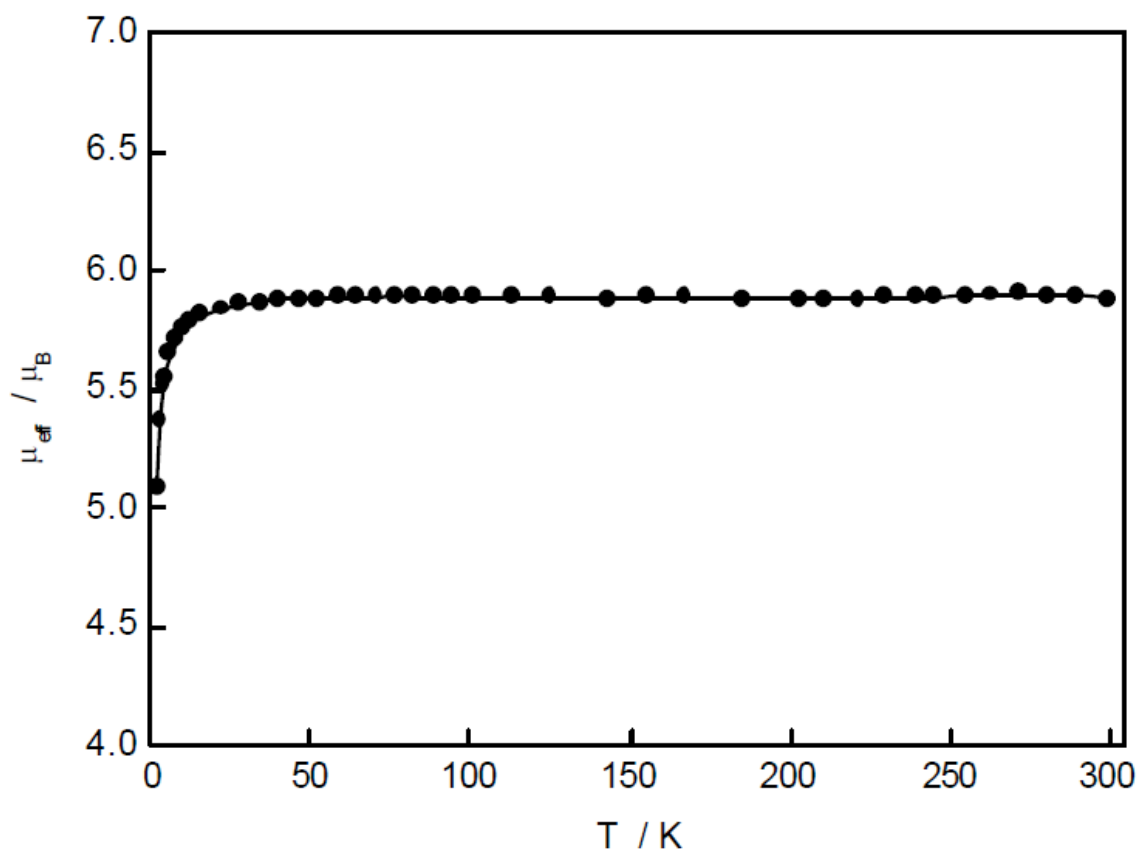

**Figure S1:** A plot of  $\mu_{eff}$  vs. temperature for **1**, in an applied field of 1 T. The solid line joins the points.

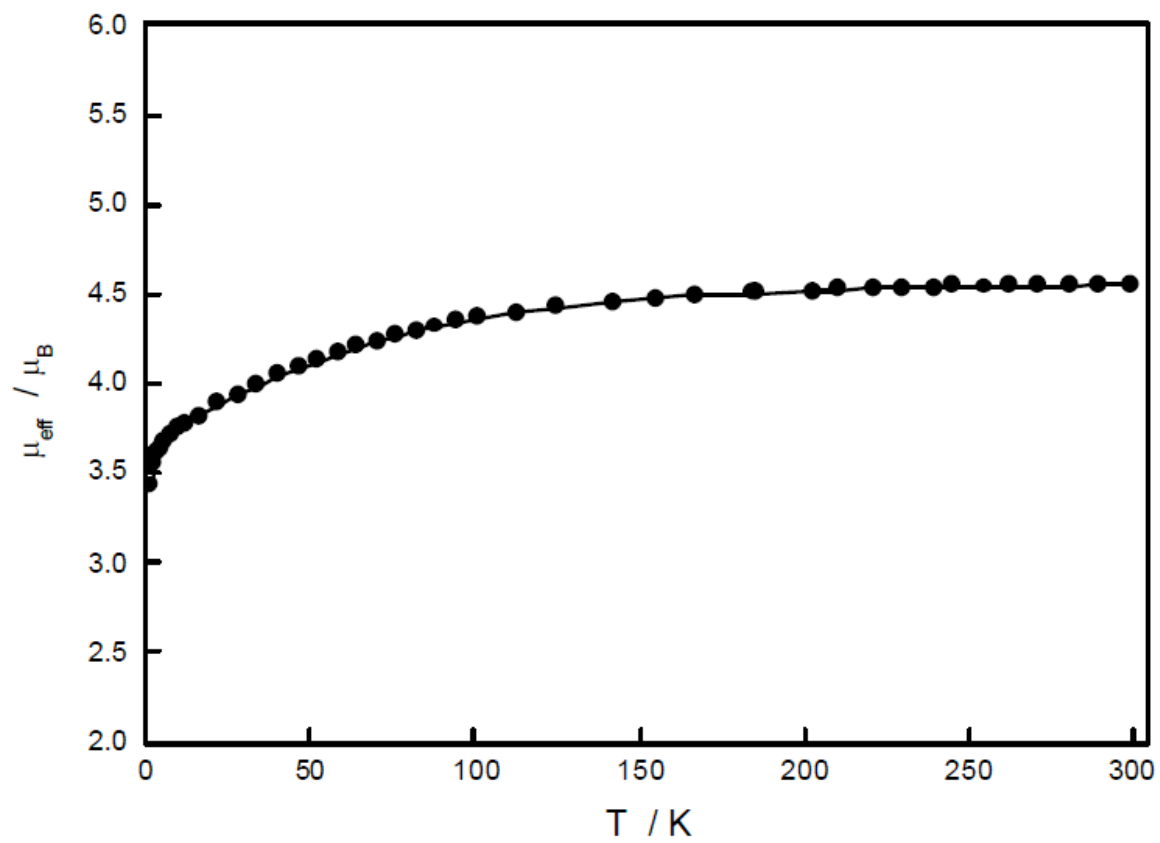

**Figure S2:** A plot of  $\mu_{\text{eff}}$  vs. temperature for **2Co**, in an applied field of 1 T. The solid line joins the points.

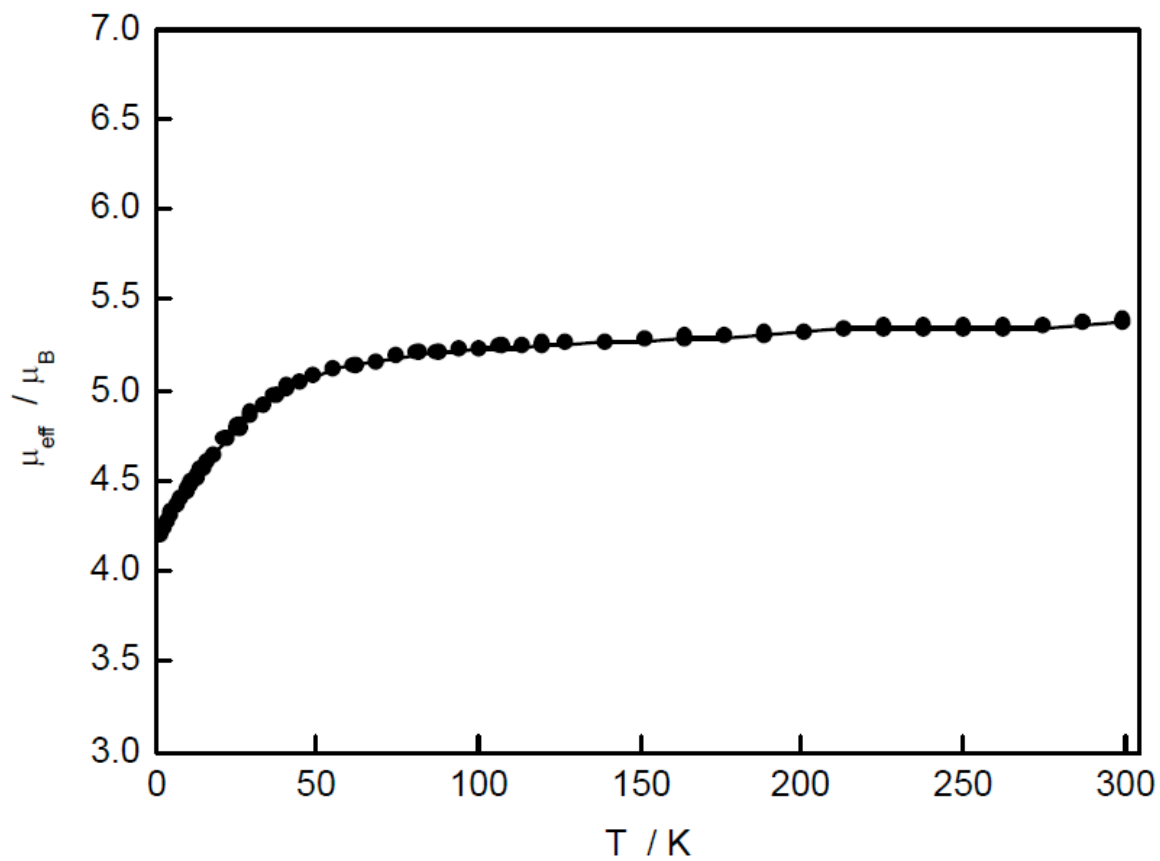

**Figure S3:** A plot of  $\mu_{eff}$  vs. temperature for **3**, in an applied field of 1 T. The solid line joins the points.

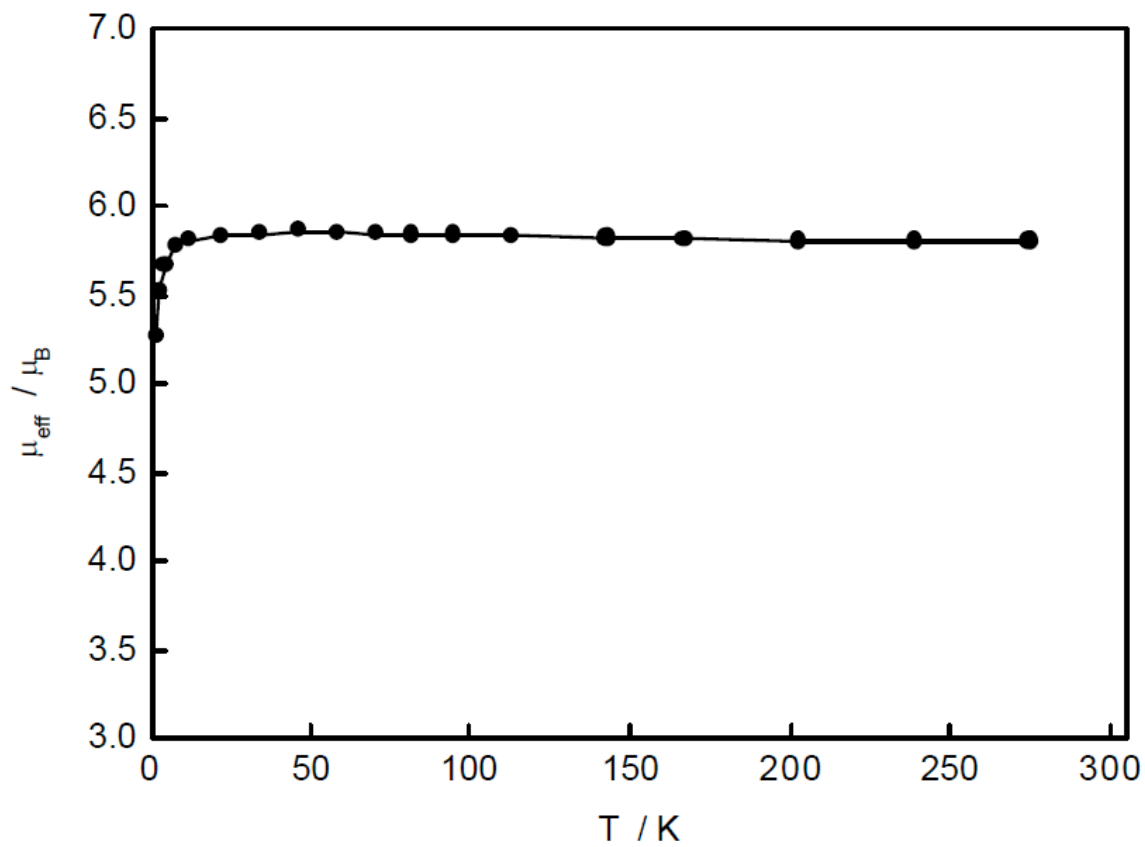

**Figure S4:** A plot of  $\mu_{eff}$  vs. temperature for **4**, in an applied field of 1 T. The solid line joins the points.

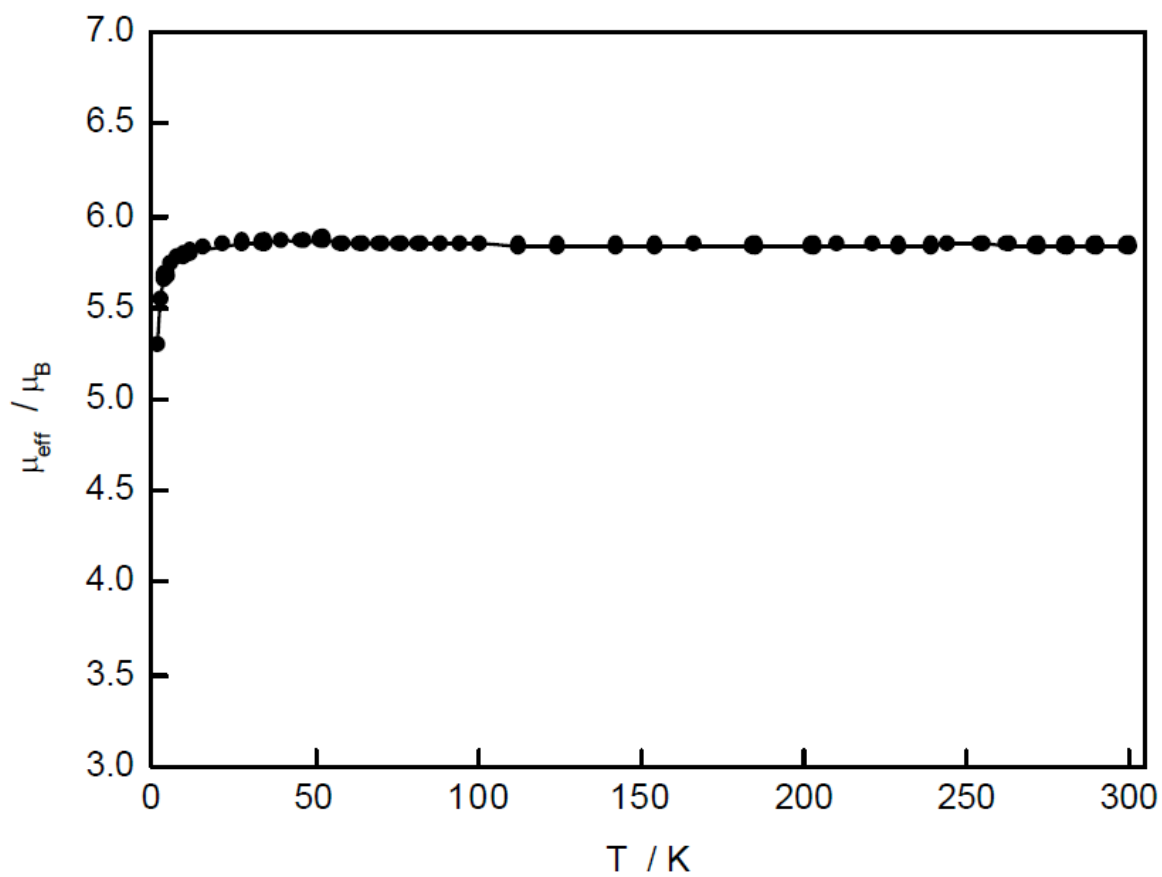

**Figure S5:** A plot of  $\mu_{eff}$  vs. temperature for **5**, in an applied field of 1 T. The solid line joins the points.

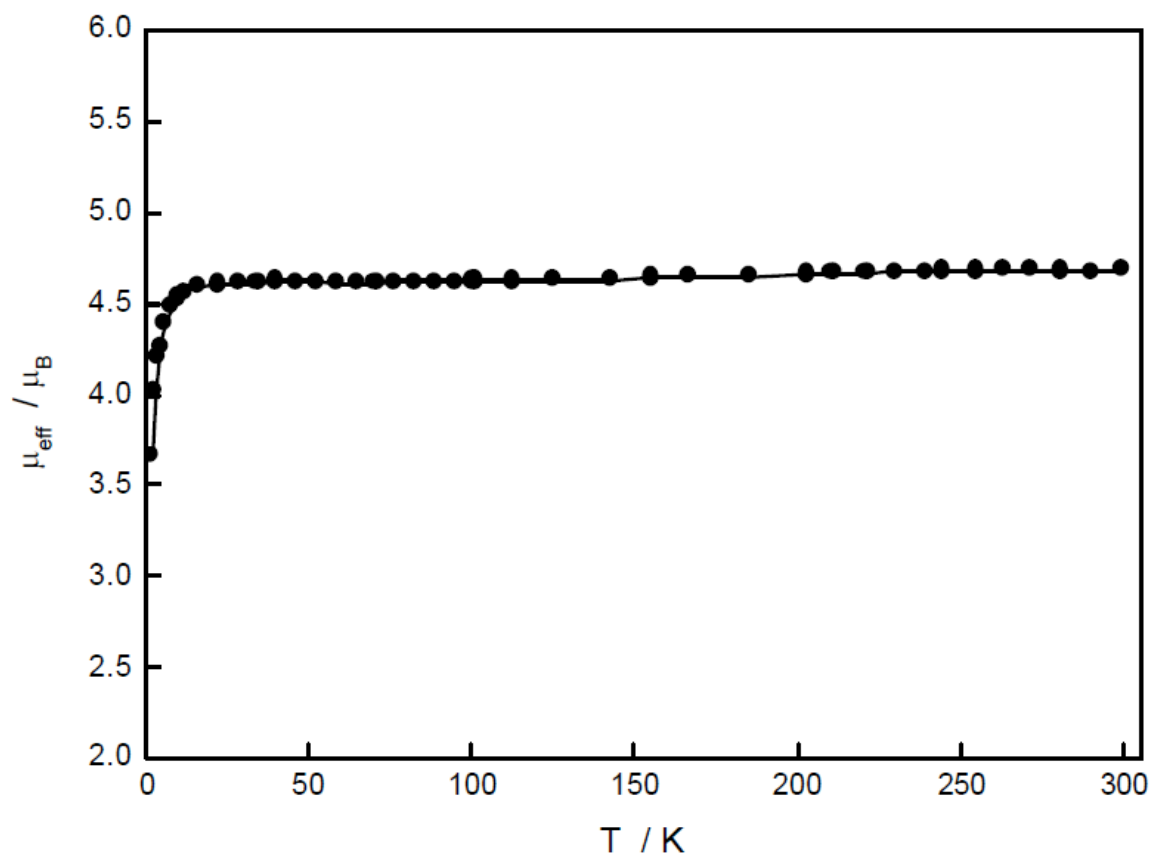

**Figure S6:** A plot of  $\mu_{eff}$  vs. temperature for **6Fe**, in an applied field of 1 T. The solid line joins the points.

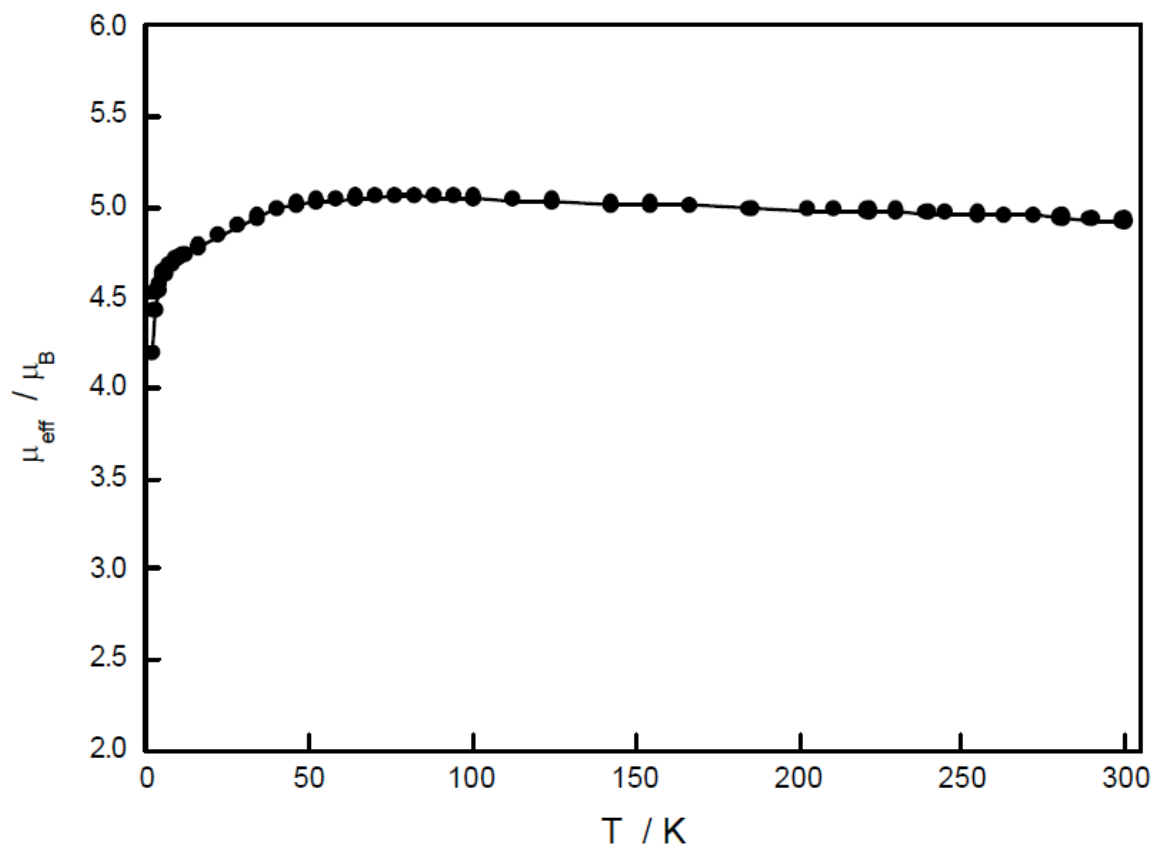

**Figure S7:** A plot of  $\mu_{\text{eff}}$  vs. temperature for **6Co**, in an applied field of 1 T. The solid line joins the points.
